# Supplementary material for: Highly exposed surface pore-edge FeNx sites for enhanced oxygen reduction performance in Zn-air batteries
Source: Royal Society of Chemistry journal article supplement (doi:10.1039/d2qi02228a), 2022-12-15
Supplement: d2qi02228a1.pdf [file d2qi02228a1.pdf]

## **Supporting Information**

### **Highly exposed surface pore-edge FeN<sub>x</sub> sites for enhanced oxygen reduction performance in Zn-air batteries**

Xiangyu Lu<sup>a</sup>, Lihui Xiao<sup>a</sup>, Peixia Yang<sup>\*a</sup>, Hao Xu<sup>a</sup>, Lilai Liu<sup>b</sup>, Ruopeng Li<sup>a</sup>, Yaqiang Li<sup>a</sup>, Huiling Zhang<sup>a</sup>, Jinqiu Zhang<sup>a</sup>, Maozhong An<sup>a</sup>.

[a]MIIT Key Laboratory of Critical Materials Technology for New Energy Conversion and Storage, School of Chemistry and Chemical Engineering, Harbin Institute of Technology, Harbin, 150001 China.

[b]College of Environmental and Chemical Engineering, Heilongjiang University of Science and Technology, Harbin, 150022, China.

\* Corresponding authors: Peixia Yang (yangpeixia@hit.edu.cn)

## Experimental Section

### Electrochemical Measurements

The electrochemical test were conducted by using a CHI-760e electrochemical station. A rotating disk electrode (RDE) and a rotating ring-disk glass carbon electrode (RRDE) were used as the working electrode. A Hg/HgO (alkaline medium) or Hg/Hg<sub>2</sub>SO<sub>4</sub> (acidic medium) electrode and a graphite sheet electrode were used as reference and counter electrodes, respectively.

In order to the RHE, a two-electrode (Pt coil and the reference electrode) were connected to be calibrated. Ultrapure hydrogen gas was sparged into the electrolyte for 10 minutes. As a result, H<sup>+</sup>/H<sub>2</sub> equilibrium was established on the Pt coil, which thus acted as a RHE. A stable open circuit voltage could be tested for several minutes, which was taken to be the conversion value. The calibration values were  $E(\text{RHE}) = E(\text{Hg}/\text{HgO}) + 0.896 \text{ V}$  in 0.1 M KOH and  $E(\text{RHE}) = E(\text{Hg}/\text{Hg}_2\text{SO}_4) + 0.716 \text{ V}$  in 0.1M HClO<sub>4</sub>, respectively.

ORR activity was measured by cyclic voltammetry (CV) at a scan rate of 50 mV·s<sup>-1</sup> and linear sweep voltammetry (LSV) with 1600 rpm at a scan rate of 10 mV·s<sup>-1</sup> in 0.1 M KOH saturated with O<sub>2</sub>/N<sub>2</sub>. The accelerated durability test (ADT) was investigated by continuous potential cycling from 0.6 to 1.0 V at a scan rate of 50 mV·s<sup>-1</sup>.

The the rotating ring disk electrode (RRDE) was used to measure the hydrogen peroxide yield (H<sub>2</sub>O<sub>2</sub>%) and the number of electron transfers ( $n$ ) according to the following equation:

$$\text{H}_2\text{O}_2(100\%) = 200 \frac{I_R/N}{I_D + I_R/N}$$

$$n = 4 \frac{I_D}{I_D + I_R/N}$$

where  $I_D$  is expressed as the disk current density,  $I_R$  is expressed as the ring current density, and  $N$  is expressed as the collection efficiency of the Pt ring (37%).

## Density functional theory (DFT) calculations

DFT calculations were performed using Dmol3 of Materials studio. The layer of graphene  $7 \times 7$  sheet as the model of graphene and the vacuum space above these sheets were taken to be 20 Å. The Perdew-Burke-Ernzerhof (PBE) functional with the basis set of the double numerical atomic orbital plus the polarization function (DNP) is adopted. The simulation of the water environment for Zn-air batteries cathode catalyst were performed with Cosmo and the dielectric constant is set to 78.54. The convergence tolerances of energy, maximum displacement, and maximum displacement were  $1.0 \times 10^{-5}$  Ha, 0.005 Å, 0.002 Ha Å<sup>-1</sup>, respectively. The smearing value was set at 0.005 Ha to accelerate the energy convergence speed.

The adsorption energy ( $E_{\text{ads}}$ ) of ORR intermediates is calculated as follows:

$$E_{\text{ads}} = E_{\text{total}} - E_{\text{o}} - E_{\text{sub}}$$

where the  $E_{\text{total}}$  is total adsorption energy of the catalyst and species,  $E_{\text{sub}}$  is the catalyst energy without adsorption, and  $E_{\text{o}}$  is the energy of the species.

The pathways on Fe<sub>4</sub>N supported N-C systems were calculated in detail according to electrochemical framework developed by Nørskov. The free energy change of every elementary reaction is calculated as follows:

$$\Delta G = \Delta E + T\Delta S + \Delta ZPE + \Delta G_{\text{field}} + \Delta G_{\text{U}} + \Delta G_{\text{pH}}$$

Where  $\Delta E$  is the reaction energy change, T is the temperature (289.15 K),  $\Delta S$  is the vibrational entropy change, and  $\Delta ZPE$  is the zero point energy, respectively. The parameters of  $\Delta ZPE$  and  $\Delta S$  can be calculated according to the vibration frequency of oxygen-contained intermediates. The influence of electric potential on the Gibbs free energy is expressed by  $\Delta G_{\text{U}} = -neU$ , where n is the number of electrons transferred and U is the electrode potential. In this study,  $\Delta G_{\text{pH}}$  and  $\Delta G_{\text{field}}$  are not involved because they have less contribution to the trends of free energy change.

## **Preparation and tests of Zn-air batteries**

The Liquid Zn-air battery was assembled with a uniform nickel foam coated with catalyst ink as an air cathode, 6 M KOH and 0.2 M  $\text{CH}_3\text{COO})_2\text{Zn}$  as the electrolyte, and a polished Zn plate as an anode. 2.5 mg of catalyst, 1 mg of acetylene black, and 4 mg of activated carbon was added to the mixed solution containing 8  $\mu\text{L}$  of Nafion and 200  $\mu\text{L}$  of isopropanol. Subsequently, the uniform catalyst ink was applied dropwise to the surface of nickel foam as an air cathode. The polarization curves of the batteries were collected using the CHI760E electrochemical workstation in an air environment. The performance of batteries was tested by the LAND CT2001A test system. The discharge-charge cycling stability of the battery at 5  $\text{mA cm}^{-2}$  with 10 min per cycle.

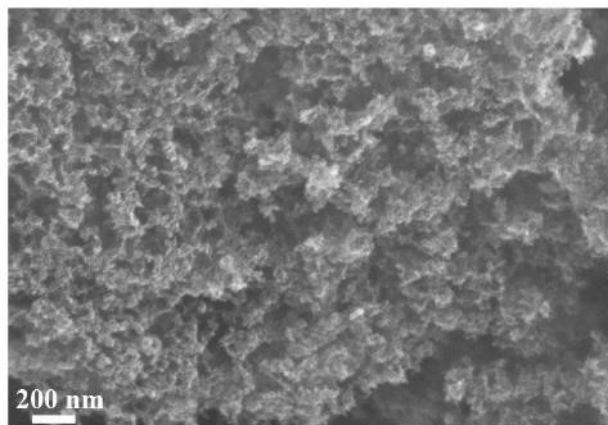

**Fig. S1.** SEM of FeN<sub>x</sub>-HPNC.

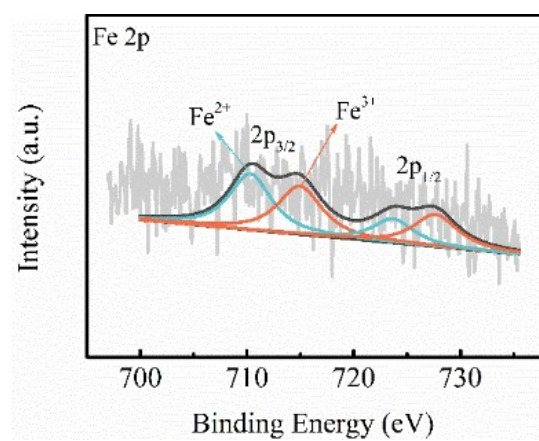

**Fig. S2.** Fe 2p XPS spectrum of SPE-FeN<sub>x</sub>-HPNC

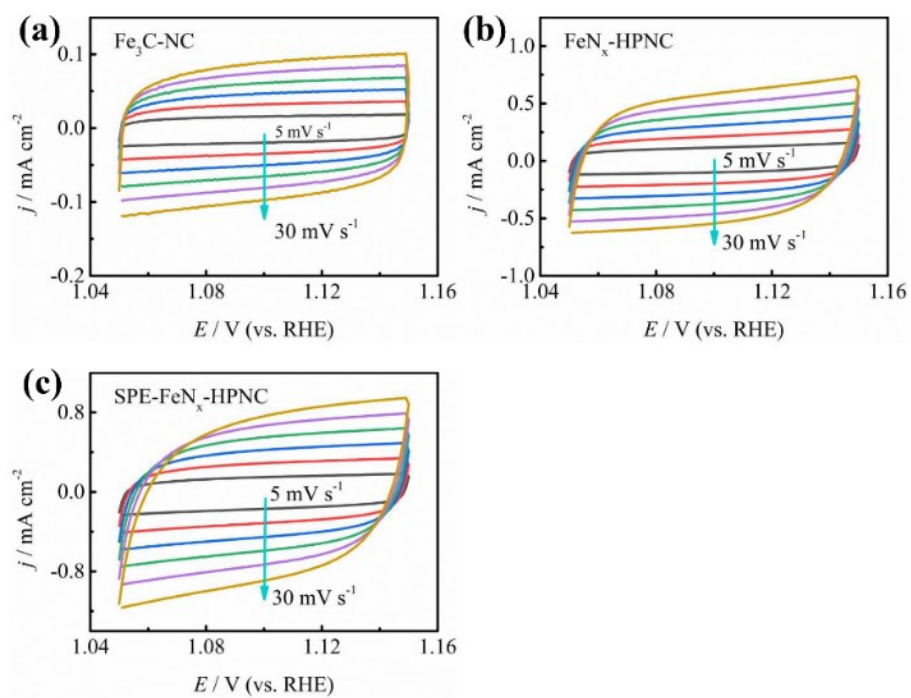

**Fig. S3.** CV curves of (a)  $\text{Fe}_3\text{C-NC}$ , (b)  $\text{FeN}_x\text{-HPNC}$  and (c)  $\text{SPE-FeN}_x\text{-HPNC}$ , respectively, at various scan rates (5, 10, 15, 20, 25, and 30  $\text{mV/s}$ ).

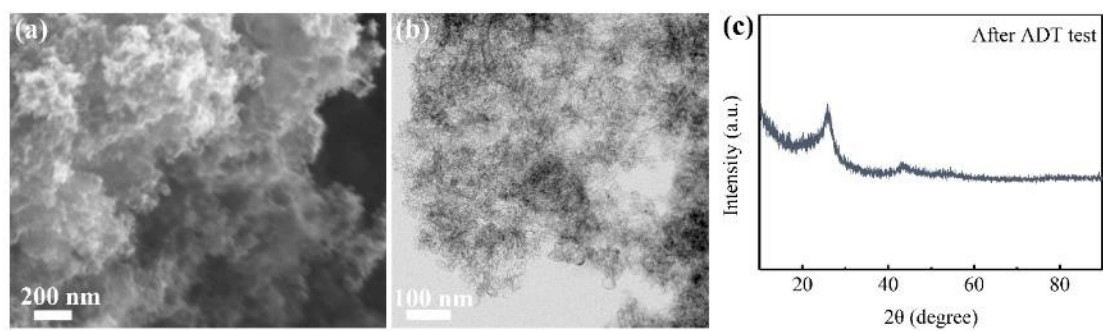

**Fig. S4.** (a) SEM image, (b)TEM image, (c) XRD pattern of SPE-FeN<sub>x</sub>-HPNC after durability test.

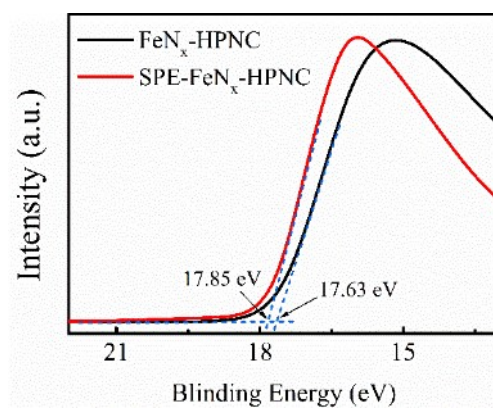

**Fig. S5.** Ultraviolet photoelectron spectroscopy analysis of  $\text{FeN}_x\text{-HPNC}$  and  $\text{SPE-FeN}_x\text{-HPNC}$ .

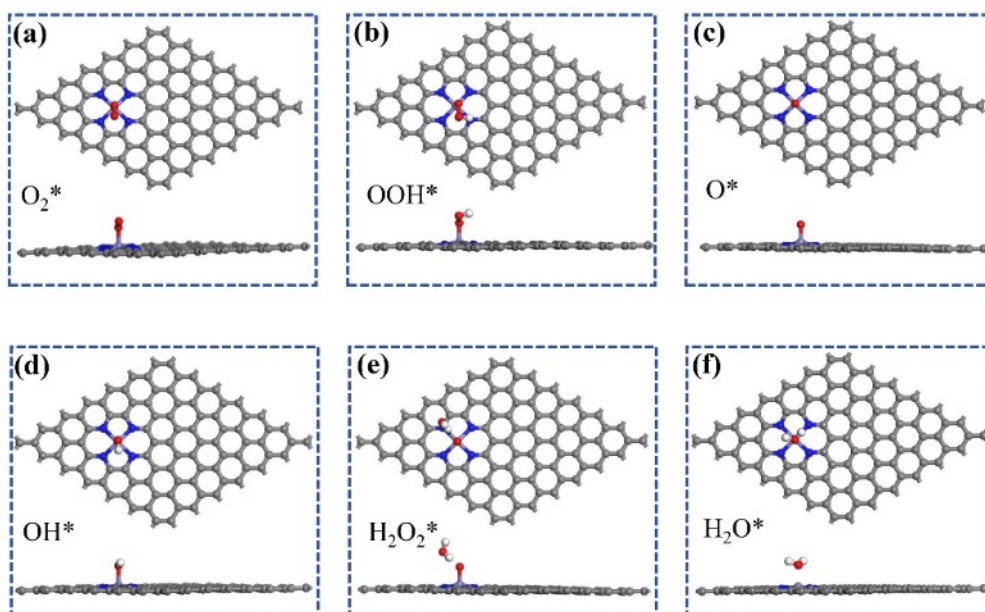

**Fig. S6.** Structure of the adsorption configurations of the ORR intermediates on the  $\text{FeN}_x$  site where gray, blue, red, and white balls represent carbon, iron, oxygen, and hydrogen atoms.

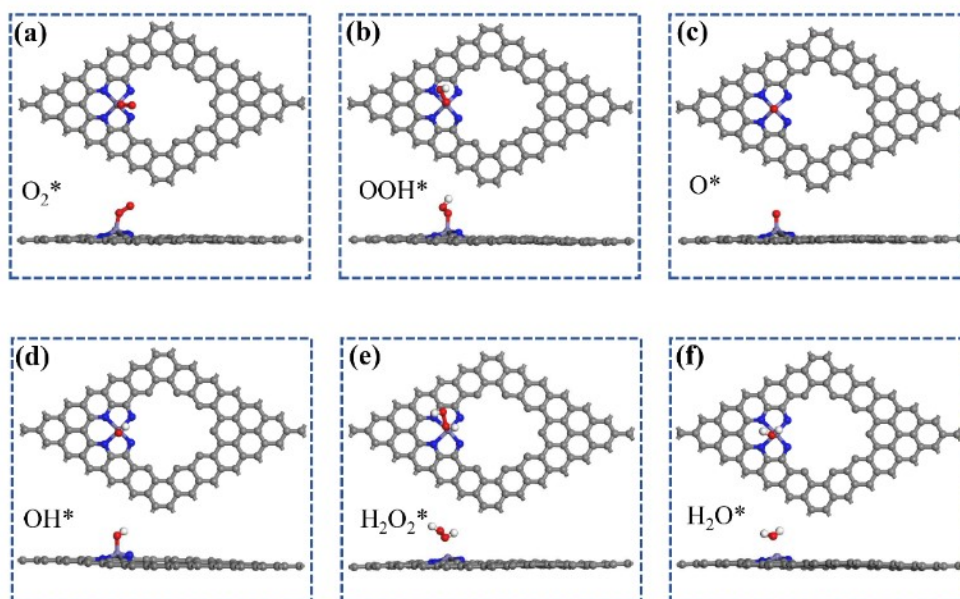

**Fig. S7.** Structure of the adsorption configurations of the ORR intermediates on the pore-edge  $\text{FeN}_x$  site where gray, blue, red, and white balls represent carbon, iron, oxygen, and hydrogen atoms.

**Table S1.** Specific surface area and pore parameters of as-prepared materials.

| Catalysts                  | Specific surface<br>area (m <sup>2</sup> g <sup>-1</sup> ) | Pore volume<br>(cm <sup>3</sup> g <sup>-1</sup> ) | Average pore diameter (nm) |
|----------------------------|------------------------------------------------------------|---------------------------------------------------|----------------------------|
| Fe <sub>3</sub> C-NC       | 198.72                                                     | 0.2785                                            | 5.4144                     |
| FeN <sub>x</sub> -HPNC     | 831.65                                                     | 2.4224                                            | 15.5145                    |
| SPE-FeN <sub>x</sub> -HPNC | 737.18                                                     | 2.1722                                            | 15.1258                    |

**Table R2.** Pore structure data from the N<sub>2</sub> adsorption/desorption isothermal measurements.

|                                            | Fe <sub>3</sub> C-NC | FeN <sub>x</sub> -HPNC | SPE-FeN <sub>x</sub> -HPNC |
|--------------------------------------------|----------------------|------------------------|----------------------------|
| S-total (cm <sup>2</sup> g <sup>-1</sup> ) | 199                  | 832                    | 737                        |
| S-micro (cm <sup>2</sup> g <sup>-1</sup> ) | 74.59                | 223                    | 173                        |
| S-meso (cm <sup>2</sup> g <sup>-1</sup> )  | 124                  | 609                    | 564                        |
| S-micro%                                   | 37.5%                | 26.8%                  | 23.4%                      |
| S-meso%                                    | 62.5%                | 73.2%                  | 76.6%                      |
| V-total (cm <sup>3</sup> g <sup>-1</sup> ) | 0.27849              | 2.42243                | 2.17221                    |
| V-micro (cm <sup>3</sup> g <sup>-1</sup> ) | 0.09945              | 0.09417                | 0.07346                    |
| V-meso (cm <sup>3</sup> g <sup>-1</sup> )  | 0.17904              | 2.32826                | 2.09875                    |
| V-micro%                                   | 35.7%                | 3.9%                   | 3.4%                       |
| V-meso%                                    | 64.3%                | 96.1%                  | 96.6%                      |

\* The S represents the specific surface area and the V represents the pore volume.

**Table S3.** The content of C, N, O and Fe of the prepared catalysts obtained from XPS

| Catalysts (at%)            | C     | N    | O    | Fe   |
|----------------------------|-------|------|------|------|
| Fe <sub>3</sub> C-NC       | 94.3  | 1.27 | 4.32 | 0.11 |
| FeN <sub>x</sub> -HPNC     | 91    | 1.82 | 7.19 | 0.01 |
| SPE-FeN <sub>x</sub> -HPNC | 91.91 | 1.91 | 6.07 | 0.11 |

**Table S4.** A comparison table of the ORR performance between this work and recently reported Pt-free catalysts in alkaline and acidic medium (vs. RHE)

| Materials                               | $E_{1/2}$ (V) in 0.1 M KOH | $E_{1/2}$ (V) in 0.1 M HClO <sub>4</sub> or 0.5 M H <sub>2</sub> SO <sub>4</sub> | References       |
|-----------------------------------------|----------------------------|----------------------------------------------------------------------------------|------------------|
| <b>SPE-FeN<sub>x</sub>-HPNC</b>         | <b>0.902</b>               | <b>0.754 (HClO<sub>4</sub>)</b>                                                  | <b>This work</b> |
| Cu-NSDC SACs                            | 0.84                       | /                                                                                | 1                |
| Fe <sub>2</sub> -N/CNTs-850             | 0.846                      | /                                                                                | 2                |
| Sb <sub>1</sub> /NG(O)                  | 0.86                       | /                                                                                | 3                |
| ZnCu-N-C (1000)                         | 0.87                       | /                                                                                | 4                |
| NHC-900                                 | 0.835                      | /                                                                                | 5                |
| Co@NrC-0.3                              | 0.85                       | /                                                                                | 6                |
| NSC/Co <sub>9</sub> S <sub>8</sub> -200 | 0.83                       | /                                                                                | 7                |
| CuSA/CuCT@NPC                           | 0.88                       | 0.70 (HClO <sub>4</sub> )                                                        | 8                |
| Fe/Ni(1:3)-NG                           | 0.842                      | /                                                                                | 9                |
| NC-Co SA                                | 0.87                       |                                                                                  | 10               |
| CoN <sub>4</sub> /NG                    | 0.87                       | /                                                                                | 11               |
| CoNi-SAs/NC                             | 0.76                       | /                                                                                | 12               |
| Fe/N-G#4                                | 0.852                      | /                                                                                | 13               |
| Fe-N <sub>x</sub> ISAs/GHSs             | 0.89                       | /                                                                                | 14               |
| NFC@Fe/Fe <sub>3</sub> C-9              | 0.87                       | 0.73 (HClO <sub>4</sub> )                                                        | 15               |
| NSPC-0.2-900                            | 0.84                       | 0.71 (HClO <sub>4</sub> )                                                        | 16               |

**Table S5.** A comparison table of the ORR durability between this work and recently reported Pt-free catalysts in alkaline medium.

| Materials                       | $\Delta E_{1/2}$ in 0.1 M KOH | References       |
|---------------------------------|-------------------------------|------------------|
| <b>SPE-FeN<sub>x</sub>-HPNC</b> | <b>8 mV (5000 cycles)</b>     | <b>This work</b> |
| Fe <sub>2</sub> -N/CNTs-850     | 26 mV (3000 cycles)           | 2                |
| Fe/Ni(1:3)-NG                   | 23 mV (3000 cycles)           | 9                |
| 3D Fe/N-G#4                     | 13 mV (3000 cycles)           | 13               |
| Fe-N <sub>x</sub> ISAs/GHSs     | 14 mV (5000 cycles)           | 14               |
| NFC@Fe/Fe <sub>3</sub> C-9      | 16 mV (30000 cycles)          | 15               |
| porous CS                       | 10 mV (1000 cycles)           | 17               |

**Table S6.** Summary of the performance of aqueous and solid state ZABs based on Pt-free athode catalysts.

| Materials                       | OCV of Aqueous<br>ZABs (V) | Aqueous ZABs<br>Peak power density (mW cm <sup>2</sup> ) | References       |
|---------------------------------|----------------------------|----------------------------------------------------------|------------------|
| <b>SPE-FeN<sub>x</sub>-HPNC</b> | <b>1.505</b>               | <b>150</b>                                               | <b>This work</b> |
| Fe <sub>0.5</sub> Co@HOMNCP     | 1.619                      | 134                                                      | 18               |
| Co/MnO@NC                       | 1.5                        | 146                                                      | 19               |
| NHC-900                         | 1.345                      | 107                                                      | 5                |
| NC-Co SA                        | 1.41                       | /                                                        | 10               |
| CoN <sub>4</sub> /NG            | 1.51                       | 115                                                      | 11               |
| CoNi-SAs/NC                     | 1.45                       | 101.4                                                    | 12               |
| Fe-N-C-700                      | 1.424                      | /                                                        | 20               |

## Reference

1. H. Zhang, Q. Sun, Q. He, Y. Zhang, X. He, T. Gan and H. Ji, *Nano Research*, 2022, DOI: 10.1007/s12274-022-4289-3.
2. C. Li, Y. Wu, M. Fu, X. Zhao, S. Zhai, Y. Yan, L. Zhang and X. Zhang, *ACS Applied Energy Materials*, 2022, **5**, 4340-4350.
3. Y. Gu, B. Xi, H. Zhang, Y. Ma and S. Xiong, *Angew Chem Int Ed Engl*, 2022, DOI: 10.1002/anie.202202200.
4. M. Qian, M. Guo, Y. Qu, M. Xu, D. Liu, C. Hou, T. T. Isimjan and X. Yang, *Journal of Alloys and Compounds*, 2022, **907**.
5. L. Wang, S. Q. Guo, Z. Hu, B. Shen and W. Zhou, *ChemCatChem*, 2022, DOI: 10.1002/cctc.202200063.
6. J. Yu, Y. Dai, Z. Zhang, T. Liu, S. Zhao, C. Cheng, P. Tan, Z. Shao and M. Ni, *Carbon Energy*, 2022, DOI: 10.1002/cey2.171.
7. Q. Zheng, Y. Xiong, K. Tang, M. Wu, H. Hu, T. Zhou, Y. Wu, Z. Cao, J. Sun, X. Yu and C. Wu, *Nano Energy*, 2022, **92**.
8. Z. Yang, K. Jiang, G. Tong, C. Ke, H. Wu, P. Liu, J. Zhang, H. Ji, J. Zhu, C. Lu and X. Zhuang, *Chemical Engineering Journal*, 2022, **437**.
9. Y. Ma, H. Fan, C. Wu, M. Zhang, J. Yu, L. Song, K. Li and J. He, *Carbon*, 2021, **185**, 526-535.
10. W. Zang, A. Sumboja, Y. Ma, H. Zhang, Y. Wu, S. Wu, H. Wu, Z. Liu, C. Guan, J. Wang and S. J. Pennycook, *ACS Catalysis*, 2018, **8**, 8961-8969.
11. L. Yang, L. Shi, D. Wang, Y. Lv and D. Cao, *Nano Energy*, 2018, **50**, 691-698.
12. X. Han, X. Ling, D. Yu, D. Xie, L. Li, S. Peng, C. Zhong, N. Zhao, Y. Deng and W. Hu, *Adv Mater*, 2019, **31**, e1905622.
13. C. Wang, Z. Li, L. Wang, X. Niu and S. Wang, *ACS Sustainable Chemistry & Engineering*, 2019, **7**, 13873-13885.
14. X. Qiu, X. Yan, H. Pang, J. Wang, D. Sun, S. Wei, L. Xu and Y. Tang, *Adv Sci (Weinh)*, 2019, **6**, 1801103.
15. M. Karuppannan, J. E. Park, H. E. Bae, Y. H. Cho and O. J. Kwon, *Nanoscale*, 2020, **12**, 2542-2554.
16. L. Wang, K. Liang, L. Deng and Y.-N. Liu, *Applied Catalysis B: Environmental*, 2019, **246**, 89-99.
17. C. Su, Y. Liu, Z. Luo, J.-P. Veder, Y. Zhong, S. P. Jiang and Z. Shao, *Chemical Engineering Journal*, 2021, **406**.
18. W. Li, B. Liu, D. Liu, P. Guo, J. Liu, R. Wang, Y. Guo, X. Tu, H. Pan, D. Sun, F. Fang and R. Wu, *Adv Mater*, 2022, **34**, e2109605.
19. Y. Niu, X. Teng, S. Gong, X. Liu, M. Xu and Z. Chen, *Energy Storage Materials*, 2021, **43**, 42-52.
20. T. Chen, J. Wu, C. Zhu, Z. Liu, W. Zhou, C. Zhu, C. Guan and G. Fang, *Chemical Engineering Journal*, 2021, **405**.
